# Supplementary material for: Optimizing nanopore adaptive sampling for pneumococcal serotype surveillance in complex samples using the graph-based GNASTy algorithm
Source: Genome Res. 2025 Apr;35(4):1025–40. doi: 10.1101/gr.279435.124 (PMC12047183; doi:10.1101/gr.279435.124)
Supplement: Supplement 3 [file Supplemental_Data_S1.xlsx]

## Sheet: bases_mapped
Experiment

## Sheet: bases_total
Experiment

## Sheet: reads_mapped
Experiment

## Sheet: reads_total
Experiment

## Sheet: read_len_mapped
Experiment

## Sheet: read_len_total
Experiment

## Sheet: enrichment
Experiment

## Sheet: flowcell_yield
Experiment

## Sheet: enrichment_calculation
Experiment
