# Supplementary material for: Optimizing nanopore adaptive sampling for pneumococcal serotype surveillance in complex samples using the graph-based GNASTy algorithm
Source: HighWire-hosted journal article supplement (doi:10.1101/gr.279435.124), 2025-03-04
Supplement: Supplemental_Code.zip [file CTVdb_import_standard_template.xlsx]

## Sheet: 1. Serotype
predicted_pheno	stage2_group	subtypes	serotype_1	serotype_2	serotype_3	serotype_4	serotype_5	serotype_6	serotype_7	serotype_8	serotype_9	serotype_10	serotype_11	serotype_12	serotype_13	serotype_14	serotype_15
1		False	01
2		False	02
3		False	03
4		False	04
5		False	05
6A/6B	6A_6B_6C_6D	TRUE	06A	06B	06C	06D	06E	06A-I	06A-II	06A-III	06A-IV	06A-V	06A-VI	06B-I	06B-II	06B-III	06C-I
6C/6D	6A_6B_6C_6D	TRUE	06A	06B	06C	06D	06E	06A-I	06A-II	06A-III	06A-IV	06A-V	06A-VI	06B-I	06B-II	06B-III	06C-I
Serogroup_6_(6E)	6A_6B_6C_6D	TRUE	06A	06B	06C	06D	06E	06A-I	06A-II	06A-III	06A-IV	06A-V	06A-VI	06B-I	06B-II	06B-III	06C-I
7F/7A		False	07F	07A
7B/40		False	07B	40
7C		False	07C
8		False	08
9A/9V		False	09V	09A
9N/9L		False	09N	09L
10A		False	10A
10B		False	10B
10C		False	10C
10F		False	10F
11F		False	11F
11A/11D		False	11A	11D
11B/11C		False	11B	11C
12F	12F_12A_12B_44_46	False	12F	12A	12B	44	46
12A/12B/44/46	12F_12A_12B_44_46	False	12F	12A	12B	44	46
13		False	13
14		False	14
15F	15F_15A	False	15A	15F
15A	15F_15A	False	15A	15F
15B/15C		False	15B	15C
16A		False	16A
16F		False	16F
17A		False	17A
17F		False	17F
18A		False	18A
18C/18B		False	18C	18B
18C		False	18C	18B
18F		False	18F
19A	19A_19AF	TRUE	19A	19A-I	19A-II	19A-III	19AF
19AF	19A_19AF	TRUE	19A	19A-I	19A-II	19A-III	19AF
19F		TRUE	19F	19F-I	19F-II	19F-III	19F-IV
19B		False	19B
19C		False	19C
20		False	20
21		False	21
22A		False	22A
22F		False	22F
23A		False	23A
23B		TRUE	23B	23B1
23F		False	23F
24F/24B		TRUE	24F	24B	24F2
24A		False	24A
25F/25A	25F_25A_38	False	25F	25A
27		False	27
28F/28A		False	28F	28A
29		False	29
31		False	31
32F/32A		False	32F	32A
33F/33A		TRUE	33F	33A	33F2
33B		False	33B
33C		False	33C
33D		False	33D
34		False	34
35B/35D		False	35B
35A/35C/42		False	35C	35A	42
35F		False	35F
36		False	36
37		False	37
38	25F_25A_38	False	25A	25F	38
39		False	39
40		False	40
41A		False	41A
41F		False	41F
43		False	43
45		False	45
47A		False	47A
47F		False	47F
48		False	48

## Sheet: 2. SerotypeVariants
predicted_pheno	var_type	gene	position	variant
6A/6B	allele	wciN		a
6C/6D	allele	wciN		b
Serogroup_6_(6E)	allele	wciN		g
12F	allele	wciI		2
12A/12B/44/46	allele	wciI		1
15F	gene_presence	glf		detected
15F	gene_presence	rmlB		detected
15F	gene_presence	rmlD		detected
15F	gene_presence	wcjE		detected
15A	gene_presence	glf		not_detected
15A	gene_presence	rmlB		not_detected
15A	gene_presence	rmlD		not_detected
15A	gene_presence	wcjE		not_detected
19A	allele	wzy		1
19F	allele	wzy		2
25F/25A	allele	wcyD		a
25F/25A	gene_presence	wcyV		not_detected
38	allele	wcyD		b
38	gene_presence	wcyV		detected

## Sheet: 3. Group
group_name
6A_6B_6C_6D
12F_12A_12B_44_46
15F_15A
19A_19AF
25F_25A_38

## Sheet: 4. Variants
var_type	gene	position	variant	group_id
allele	wciN		a	6A_6B_6C_6D
allele	wciN		b	6A_6B_6C_6D
allele	wciN		g	6A_6B_6C_6D
allele	wciI		1	12F_12A_12B_44_46
allele	wciI		2	12F_12A_12B_44_46
allele	wzy		1	19A_19AF
allele	wzy		2	19A_19AF
allele	wcyD		a	25F_25A_38
allele	wcyD		b	25F_25A_38
gene_presence	glf		detected	15F_15A
gene_presence	glf		not_detected	15F_15A
gene_presence	rmlB		detected	15F_15A
gene_presence	rmlB		not_detected	15F_15A
gene_presence	rmlD		detected	15F_15A
gene_presence	rmlD		not_detected	15F_15A
gene_presence	wcjE		detected	15F_15A
gene_presence	wcjE		not_detected	15F_15A
gene_presence	wcyV		not_detected	25F_25A_38
gene_presence	wcyV		detected	25F_25A_38
